# Supplementary material for: Parahydrogen hyperpolarized NMR detection of underivatized short oligopeptides
Source: Royal Society of Chemistry journal article supplement (doi:10.1039/d3an01345f), 2023-01-01

Supporting information

**SI\_NMR**

**Parahydrogen Hyperpolarized NMR Detection of Underivatized Short Oligopeptides**

Nele Reimets, Kerti Ausmees, Sirje Vija, Aleksander Trummal, Merle Uudsemaa, Indrek Reile\*

National Institute of Chemical Physics and Biophysics, Akadeemia tee 23, 12618 Tallinn, Estonia

|                                                                                                                                            |               |
|--------------------------------------------------------------------------------------------------------------------------------------------|---------------|
| <b>Sample preparation for A<sub>2</sub> and A<sub>3</sub> nhPHIP complex characterization by <sup>1</sup>H, COSY, NOESY, HSQC and HMBC</b> | <b>.....2</b> |
| <b>NMR experimental conditions</b>                                                                                                         | <b>.....2</b> |
| Table SA1. NMR data for the symmetric chemosensor complex without an analyte, measured at 10°C.                                            | .....3        |
| Table SA2. <sup>1</sup> H NMR data for A <sub>3</sub> and 3F4MePy solution in ratio of 1:8 at 25°C                                         | .....4        |
| Table SA3. NMR data for the two diastereomeric A <sub>3</sub> -Ir complexes, measured at 10°C                                              | .....5        |
| Table SA4. NMR data for the two diastereomeric A <sub>2</sub> -Ir complexes, measured at 10°C.                                             | ..... 11      |

## Sample preparation for A<sub>2</sub> and A<sub>3</sub> nhPHIP complex characterization by <sup>1</sup>H, COSY, NOESY, HSQC and HMBC

Oligopeptide, Ir-catalyst and cosubstrate were dissolved, mixed and heated as described for nhPHIP samples in SI\_nhPHIP. As the only difference, methanol-d<sub>3</sub> was used as the solvent to avoid deuteration of exchangeable NH protons by methanol-d<sub>4</sub>. The sample consisted of 1.2 mM [Ir(Cl)(COD)(IMes)], 18-fold excess of 3F4MePy and 1 mM oligopeptide in a total sample volume of 600 μL.

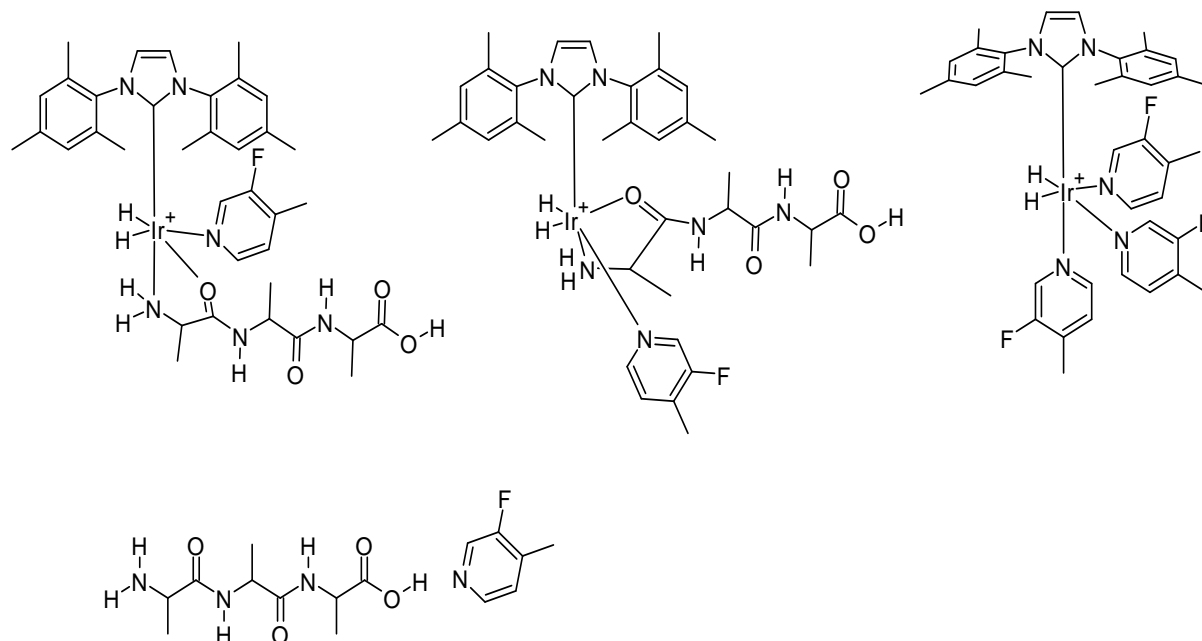

Figure SA1. Typical sample contains all of the depicted structures. The two A<sub>3</sub> containing Iridium complexes are diastereomers.

## NMR experimental conditions

Spectra were acquired on a cryoprobe equipped 800 MHz Bruker Avance III spectrometer. <sup>1</sup>H, COSY and NOESY spectra of samples in methanol-d<sub>3</sub> were acquired with single solvent signal (-OH) suppression by excitation sculpting to remove the non-deuterated methanol-d<sub>3</sub> signal without suppressing exchangeable peptide NH signals. Homonuclear 2D experiments were acquired in 7200 Hz spectral width in both dimensions and the indirect dimension was sampled in 256 increments. NOESY spectra were recorded with 700 ms mixing time for optimal observation of both NOE and exchange effects.

HSQC and HMBC spectra were acquired with standard Bruker Topspin parameter set conditions, using adiabatic pulses for <sup>13</sup>C.

Table SA1. NMR data for the symmetric chemosensor complex without an analyte, measured at 10°C.

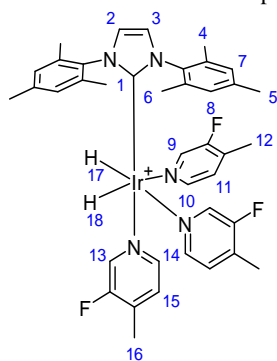

| Atom label | $^1\text{H}$               | $^{13}\text{C}$ |
|------------|----------------------------|-----------------|
| 1          | -                          | 137.2           |
| 2 and 3    | 7.11 (s, 2H)               | 128.2           |
| 4 and 6    | 2.04 (s, 12H)              | 17.5            |
| 5          | 2.31 (s, 6H)               | NA              |
| 7 and 8    | 7.13 (s, 2H)               | 122.6           |
| 9          | 7.86 (d, $J = 3.5$ Hz, 2H) | 1423.0          |
| 10         | 8.18 (d, $J = 5.4$ Hz, 2H) | 148.5           |
| 11         | 7.20-7.16 (m, 2H)          | 127.6           |
| 12         | 2.22 (s, 6H)               | 19.7            |
| 13         | 7.97 (d, $J = 3.9$ Hz, 1H) | 143.0           |
| 14         | 7.73 (d, $J = 5.8$ Hz, 1H) | 150.7           |
| 15         | 6.94-6.90 (m, 1H)          | 128.2           |
| 16         | 2.13 (s, 3H)               | NA              |
| 17 and 18  | -23.08 (s, 2H)             | -               |

$^{13}\text{C}$  chemical shifts obtained from HSQC and HMBC measurements for the  $\text{A}_2\text{-Ir}$ -complex.

Table SA2. <sup>1</sup>H NMR data for A<sub>3</sub> and 3F4MePy solution in ratio of 1:8 at 25°C.

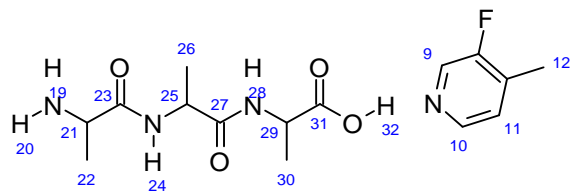

| Atom label | <sup>1</sup> H                   | <sup>13</sup> C |
|------------|----------------------------------|-----------------|
| 9          | 8.32 (d, $J = 1.9$ Hz, 1H)       | 145.7           |
| 10         | 8.23 (dd, $J = 4.9, 0.9$ Hz, 1H) | 145.7           |
| 11         | 7.41 – 7.32 (m, 1H)              | 127.6           |
| 12         | 2.35 (d, $J = 0.9$ Hz, 3H)       | 13.4            |
| 19         | -                                | -               |
| 20         | -                                | -               |
| 21         | 3.89 (q, $J = 7.1$ Hz, 1H)       | 49.9            |
| 22         | 1.55 (d, $J = 7.1$ Hz, 3H)       | NA              |
| 23         | -                                | 171.0           |
| 24         | 8.61 (d, $J = 7.1$ Hz, 1H)       | -               |
| 25         | 4.36 (q, $J = 7.2$ Hz, 1H)       | 50.7            |
| 26         | 1.39 (d, $J = 7.2$ Hz, 3H)       | NA              |
| 27         | -                                | 173.1           |
| 28         | 7.95 (d, $J = 6.4$ Hz, 1H)       | -               |
| 29         | 4.14 (q, $J = 7.0$ Hz, 1H)       | 51.2            |
| 30         | 1.34 (d, $J = 7.1$ Hz, 3H)       | NA              |
| 31         | -                                | 178.7           |
| 32         | -                                | -               |

NA - Not clearly resolved in HMBC

The image displays two chemical structures, labeled 1 and 2, which are complexes of a zirconium (Zr) atom. Both structures feature a central Zr atom coordinated by a 1,2-bis(4-methylphenyl)imidazole ligand (atoms 1-8), a 4-fluoropyridine ligand (atoms 9-12), and a 2,2,6,6-tetramethylheptanedioate ligand (atoms 17-20). The Zr atom is also coordinated to a 2,2,6,6-tetramethylheptanedioate ligand (atoms 21-24) and a 2,2,6,6-tetramethylheptanedioate ligand (atoms 25-32). The structures are shown in a perspective view, with the Zr atom at the center and the ligands extending outwards. The atoms are numbered 1 through 32, with the Zr atom itself being the central point of coordination.

Diastereomer 1 and 2 signals could not be explicitly assigned because they form in equal amounts. Therefore, all left-hand signals were tentatively assigned to diastereomer 2 and right-hand signals to diastereomer 1.

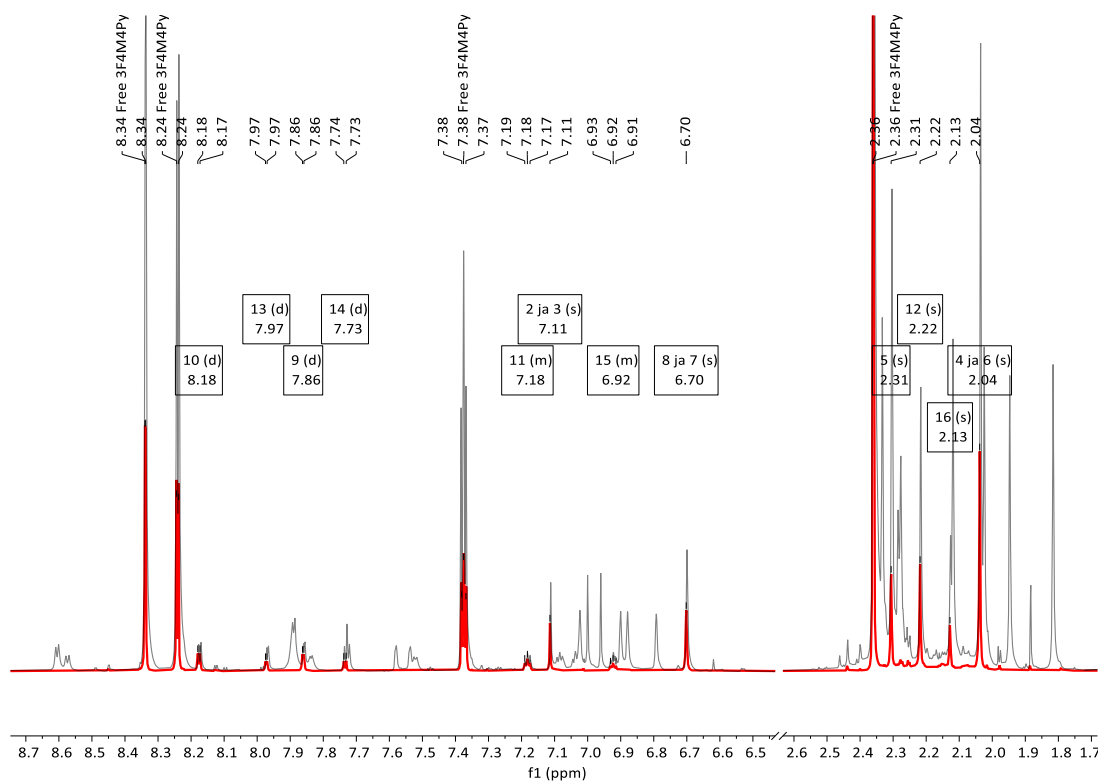

Figure SA2. Symmetric complex (red spectrum, Ir:3F4MePy in 1:18 ratio in CD<sub>3</sub>OD) overlaid with A<sub>3</sub> containing hyperpolarization mixture (dark grey, Ir:3F4MePy:A<sub>3</sub> in 1:18:0.8 ratio in CD<sub>3</sub>OH). The spectra were used to identify the non-analyte associated complex in the spectrum. See page 14 of this document for NMR spectra of individual components.

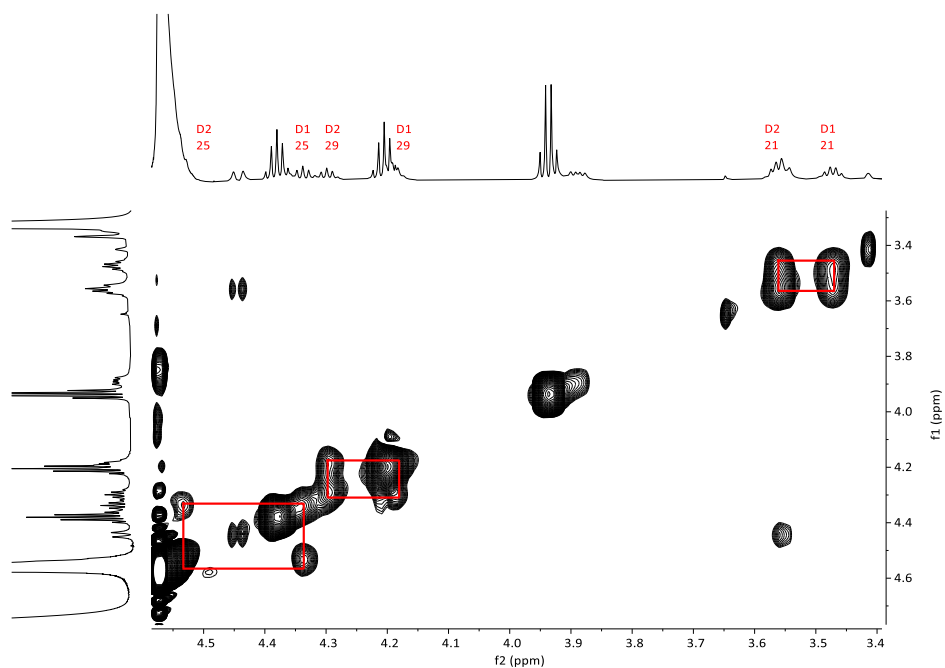

Figure SA3. Expansion of in-phase exchange peaks in NOESY experiment in the region of A<sub>3</sub>  $\alpha$ -CH protons, showing the exchange between nhPHIP complex diastereomers.

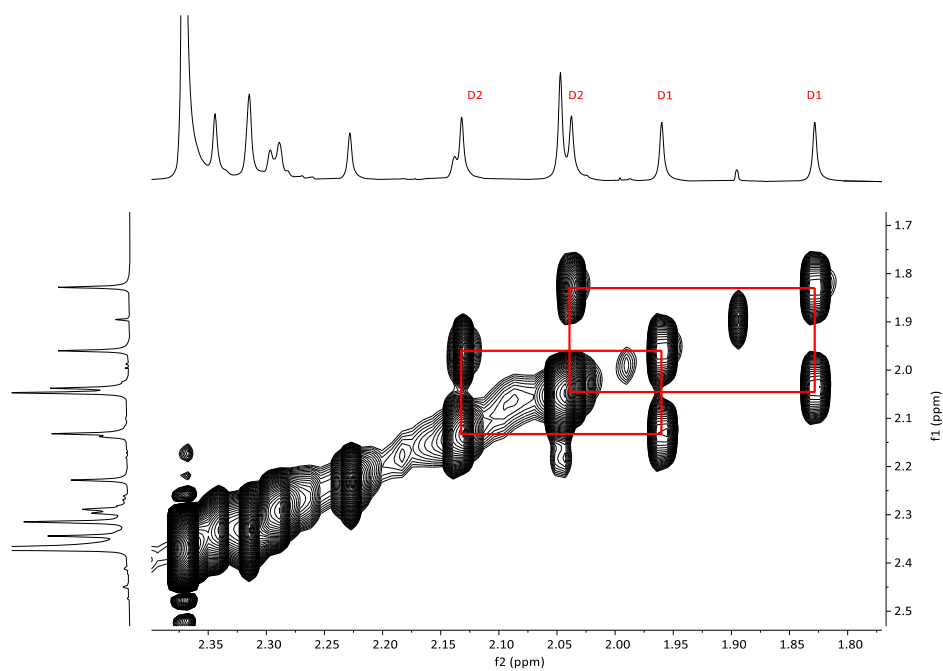

Figure SA4. Expansion of in-phase exchange peaks in NOESY experiment in the region of IMes CH<sub>3</sub> protons 4 and 6, showing exchange between diastereomers.

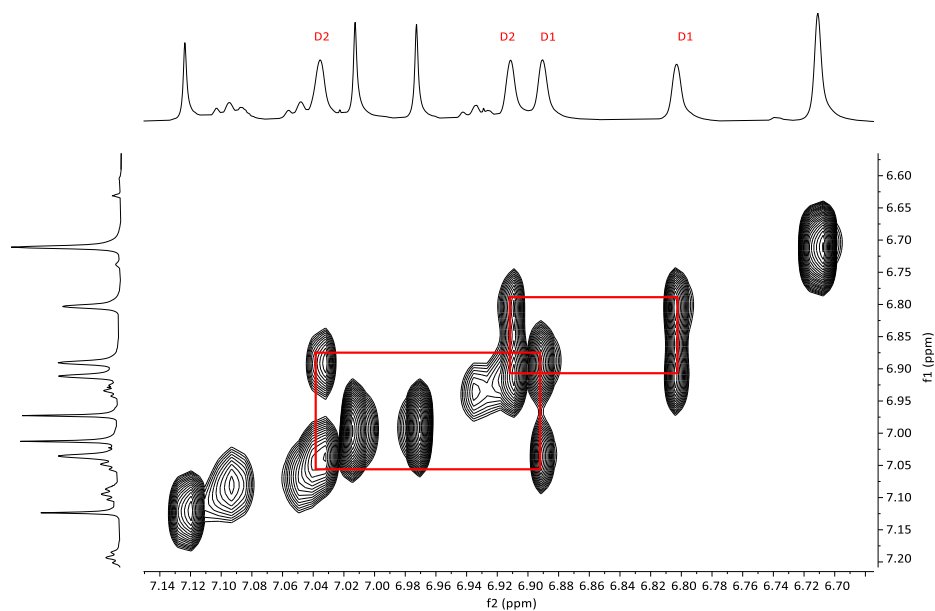

Figure SA5. Expansion of in-phase exchange peaks in NOESY experiment in the region of IMes aromatic CH protons 7 and 8, showing the exchange between diastereomers.

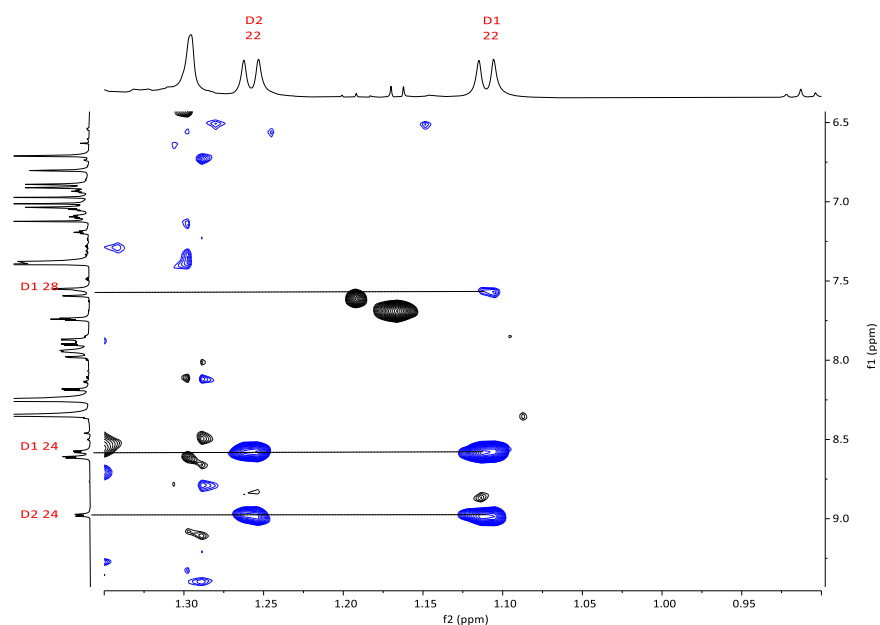

Figure SA6. Expansion of NOESY spectrum depicting NOE responses between  $A_3$   $CH_3$  (22) and NH protons 24 and 28. NOE responses between 22 and 28 can only appear in the case of a 5-membered Ir- $A_3$  complex (see SI\_DFT for calculated geometries).

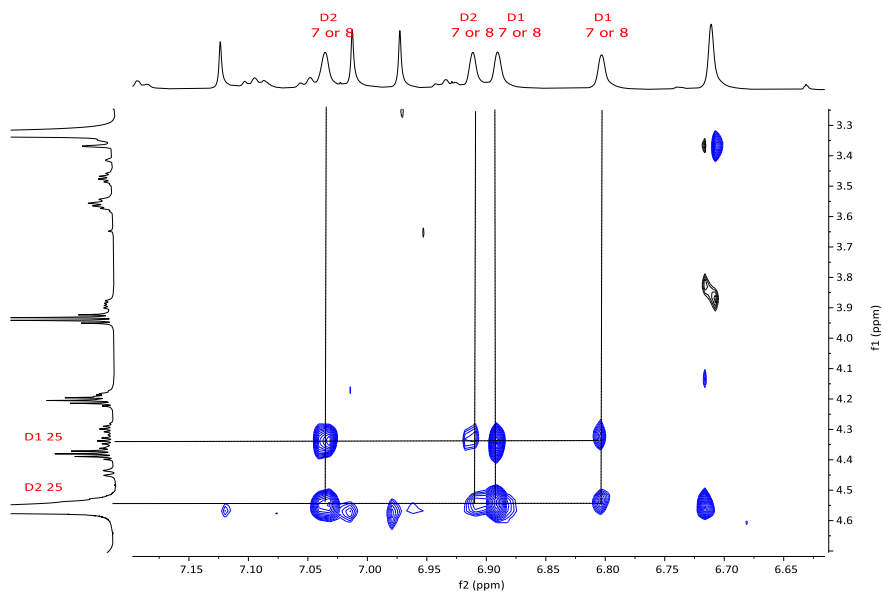

Figure SA7. Expansion of NOESY spectrum depicting NOE responses between  $A_3$  -CH (25) and IMes aromatic protons 7 and 8. NOE responses between 25 and IMes aromatic 7 and 8 can only appear in the case of a 5-membered Ir- $A_3$  complex (see SI\_DFT for calculated geometries).



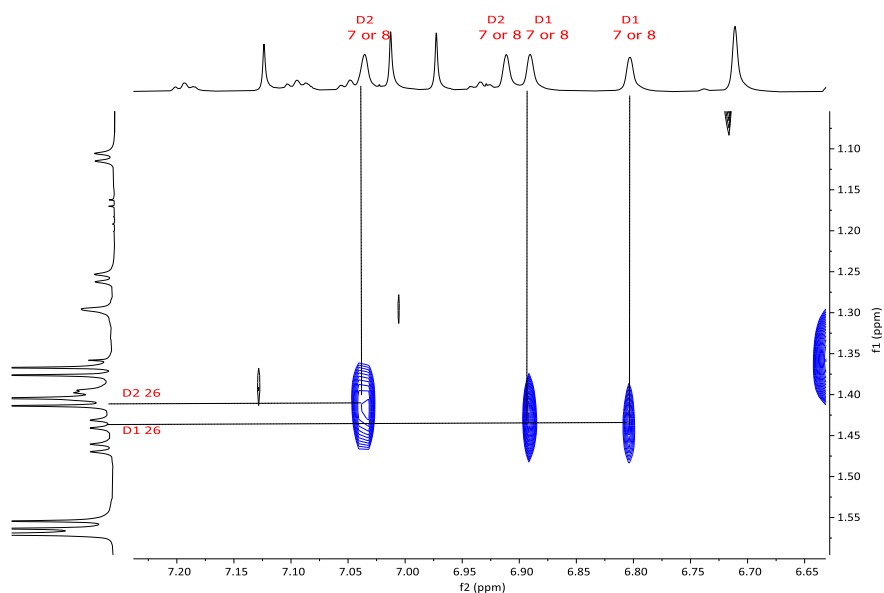

Figure SA8. Expansion of NOESY spectrum depicting NOE responses between  $A_3$ -CH<sub>3</sub> (26) and IMes aromatic protons 7 and 8. NOE responses between 26 and IMes aromatic 7 and 8 can only appear in the case of a 5-membered Ir- $A_3$  complex (see SI\_DFT for calculated geometries).

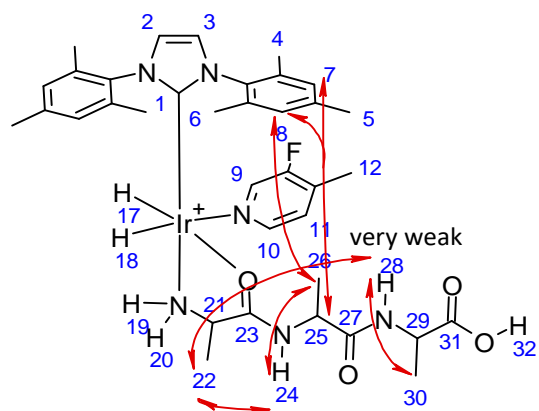

Figure SA9. All NOE responses in A<sub>3</sub>-Ir complex diastereomers.

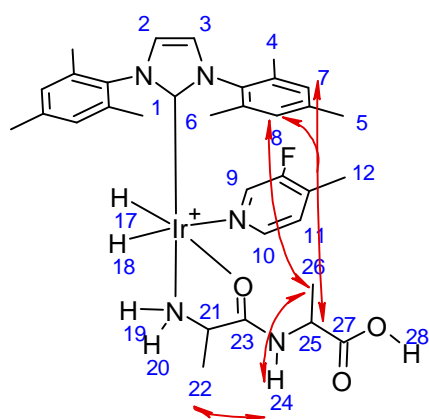

Figure SA10. All NOE responses in A<sub>2</sub>-Ir complex diastereomers.

Table SA4. NMR data for the two diastereomeric A<sub>2</sub>-Ir complexes, measured at 10°C.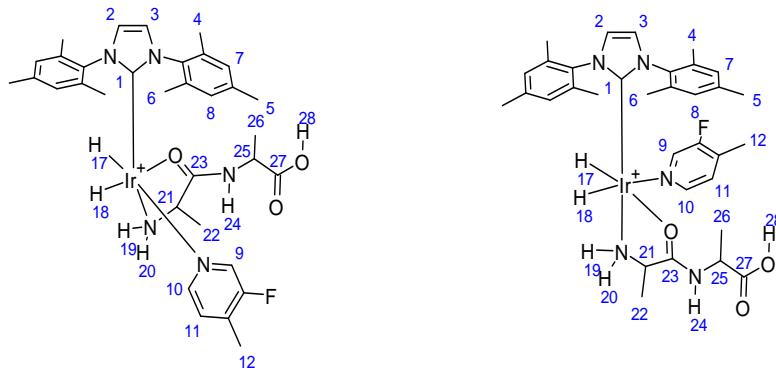

| Atom label | Diastereomer 1 (minor)            |                 | Diastereomer 2 (major)            |                 | Comment                                                                                                |
|------------|-----------------------------------|-----------------|-----------------------------------|-----------------|--------------------------------------------------------------------------------------------------------|
|            | <sup>1</sup> H                    | <sup>13</sup> C | <sup>1</sup> H                    | <sup>13</sup> C |                                                                                                        |
| 1          | -                                 | 137.6           | -                                 | 137.6           |                                                                                                        |
| 2 and 3    | 6.95 (s, 1H)                      | 121.5           | 6.99 (s, 1H)                      | 121.5           | Diastereomer 2 overlaps with Diastereomer 2 8/7 signals in <sup>1</sup> H                              |
| 4 and 6    | 1.84 (s, 6H)<br>2.13 (s, 6H)      | 17.0<br>19.7    | 2.03 (s, 6H)<br>1.94 (s, 6H)      | 17.5<br>17.1    | Could not be fully assigned                                                                            |
| 5          | 2.31 (s, 6H)                      | 19.9            | 2.31 (s, 6H)                      | 19.9            | Diastereomers overlap <sup>1</sup> H                                                                   |
| 7 and 8    | 6.99 (s, 2H)<br>6.79 (s, 2H)      | 128.2<br>128.0  | 6.88 (s, 2H)<br>6.95 (s, 2H)      | 128.4<br>128.2  | Could not be fully assigned. Diastereomer 2 overlaps with diastereomer 2 2/3 signals in <sup>1</sup> H |
| 9          | 7.61 (s, 1H)                      | 142.7           | 7.56 (d, <i>J</i> = 3.2 Hz, 1H)   | 140.7           |                                                                                                        |
| 10         | 7.94 (d, <i>J</i> = 5.7 Hz, 1H)   | 148.3           | 7.91 (d, <i>J</i> = 5.8 Hz, 1H)   | 149.1           |                                                                                                        |
| 11         | 7.10 – 7.06 (m, 1H)               | 126.9           | 7.10 – 7.06 (m, 1H)               | 126.9           | The two diastereomers overlap in <sup>1</sup> H                                                        |
| 12         | 2.26 (s, 3H)                      | 12.6            | 2.28 (s, 3H)                      | 12.6            |                                                                                                        |
| 17         | -23.39 (d, <i>J</i> = 9.6 Hz, 1H) | -               | -30.46 (d, <i>J</i> = 9.1 Hz, 1H) | -               |                                                                                                        |
| 18         | -30.03 (d, <i>J</i> = 9.6 Hz, 1H) | -               | -23.33 (d, <i>J</i> = 9.1 Hz, 1H) | -               |                                                                                                        |
| 19 and 20  | 5.05                              | -               | 5.05                              | -               | Overlaps with OH, chemical obtained shifts from NOESY                                                  |
| 21         | 3.45 – 3.39 (m, 1H)               | 56.0            | 3.52 (p, <i>J</i> = 7.3 Hz, 1H)   | 54.6            |                                                                                                        |
| 22         | 0.97 (d, <i>J</i> = 7.5 Hz, 3H)   | 18.1            | 1.20 (d, <i>J</i> = 7.3 Hz, 3H)   | 16.7            |                                                                                                        |
| 23         | -                                 | 179.7           | -                                 | 180.1           |                                                                                                        |
| 24         | 7.99                              | -               | 8.25                              | -               | Diastereomer 1 and 2 overlap with other signals in <sup>1</sup> H, chemical shifts obtained from NOESY |
| 25         | 4.34 – 4.28 (m, 1H)               | NA              | 4.37 (p, <i>J</i> = 7.3 Hz, 1H)   | 50.3            | Deastereomer 1 overlaps with an impurity in the sample                                                 |
| 26         | 1.39 (d, <i>J</i> = 7.8 Hz, 3H)   | 17.3            | 1.36 (d, <i>J</i> = 7.3 Hz, 3H)   | 18.8            |                                                                                                        |
| 27         | -                                 | 176.9           | -                                 | 176.2           |                                                                                                        |
| 28         | -                                 | -               | -                                 | -               |                                                                                                        |

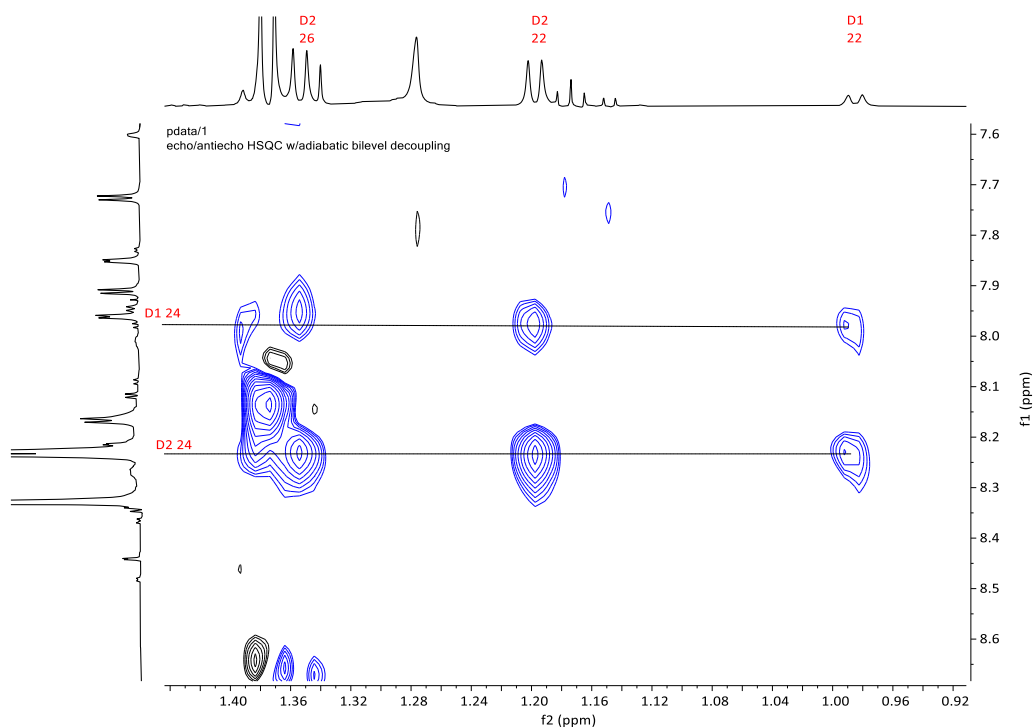

Figure SA11. Expansion of NOESY spectrum depicting NOE responses between A<sub>2</sub> NH (25) and CH<sub>3</sub> protons of 22 and 26. NOE responses between 24 and 22 and 26 can only appear in the case of a 5-membered Ir-A<sub>2</sub> complex (see SI\_DFT for calculated geometries).

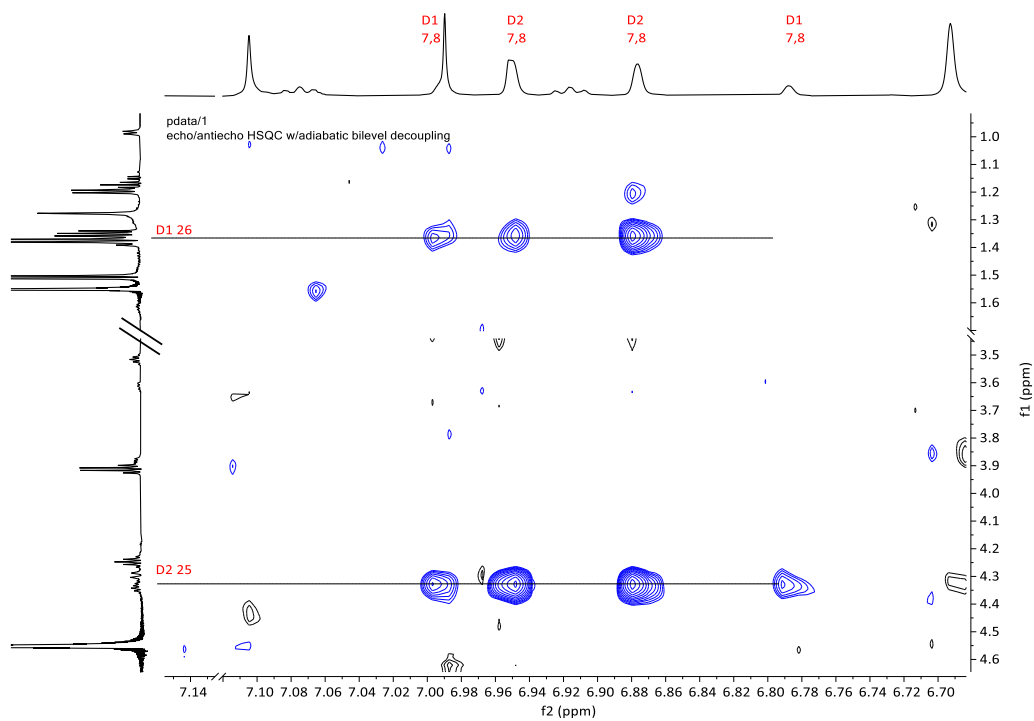

Figure SA12. Expansion of NOESY spectrum depicting NOE responses between A<sub>2</sub> 25, 26 and IMes 8 and 7 signals.

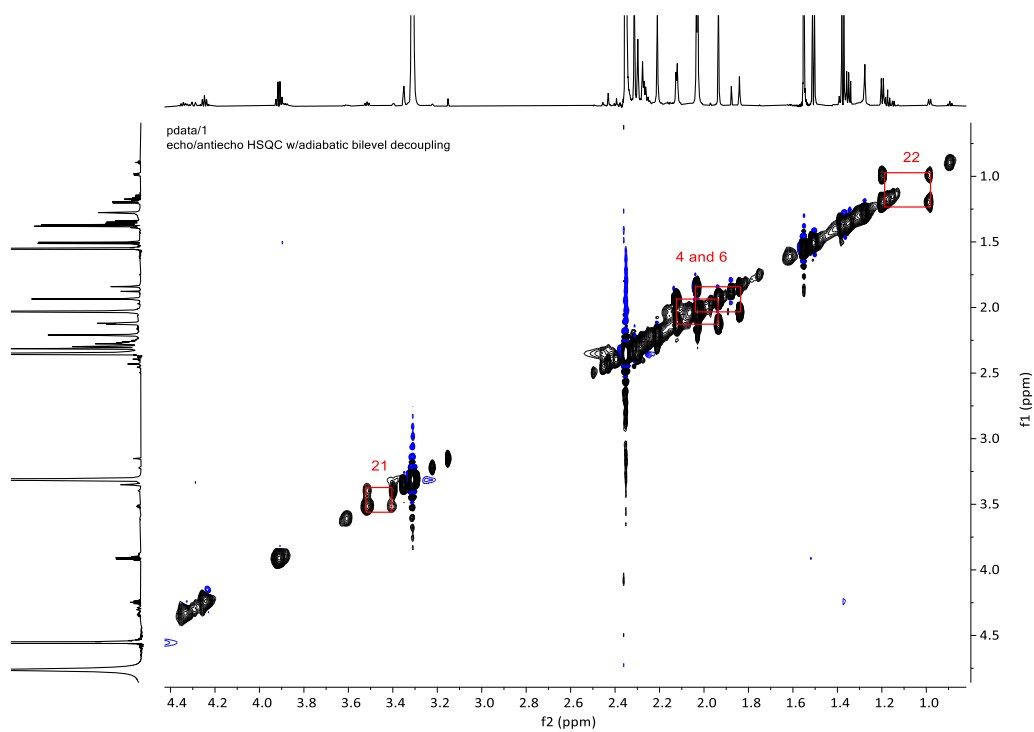

Figure SA13. Expansion of in-phase exchange peaks in NOESY experiment in the region of IMes CH<sub>3</sub> protons 4 and 6, and A<sub>2</sub> 21 and 22, showing exchange between diastereomers

$^1\text{H}$  NMR (800 MHz,  $\text{CD}_3\text{OD}$ ) for the symmetric complex at 10°C

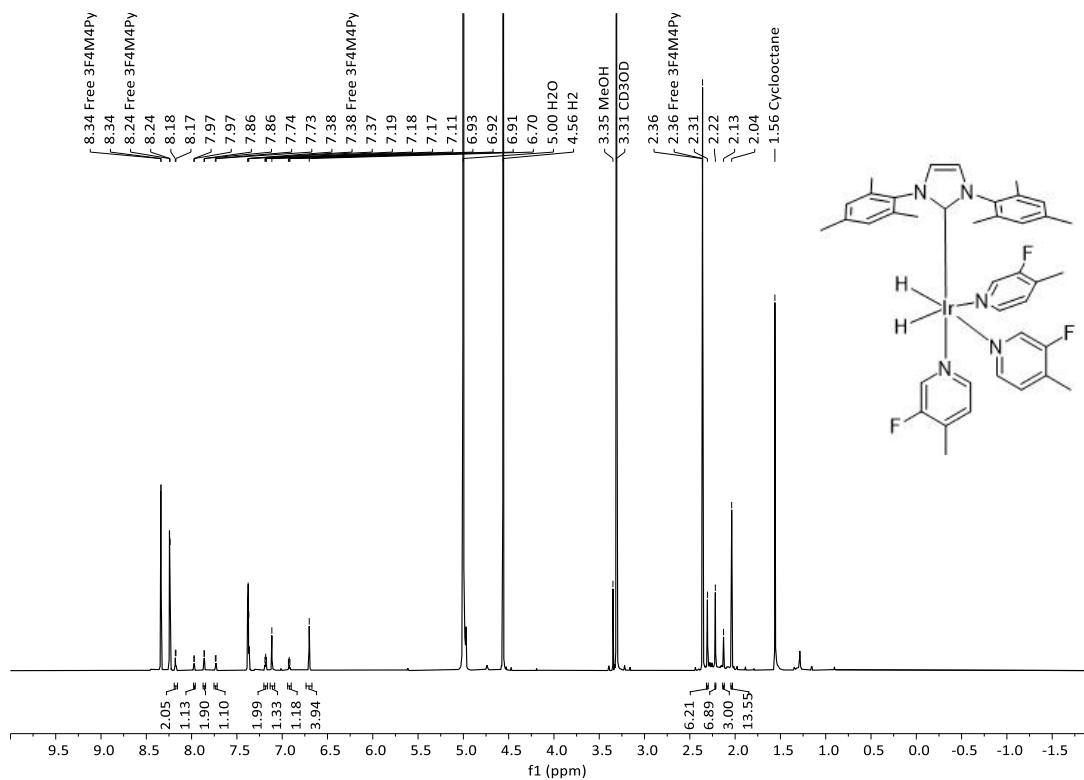

$^1\text{H}$  NMR (800 MHz,  $\text{CD}_3\text{OD}$ ) for the  $\text{A}_3\text{:3F4MePy}$  1:8 mixture at 25°C

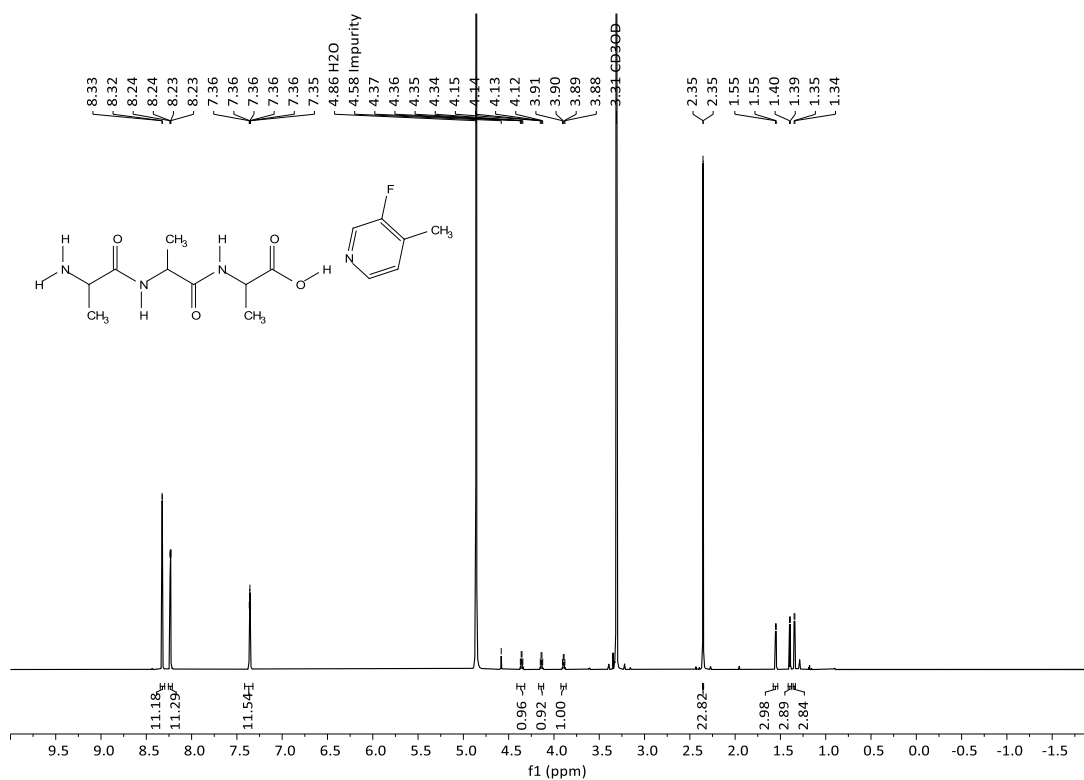

Supplement: d3an01345f3.pdf [file d3an01345f3.pdf]
